1 **Comprehensive annotations of the mutational spectra of SARS-CoV-2 spike protein: a fast**  
2 **and accurate pipeline**

3  
4 M. Shaminur Rahman<sup>1\*</sup>, M. Rafiul Islam<sup>1\*</sup>, M. Nazmul Hoque<sup>1\*,2</sup>, A. S. M. Rubayet Ul Alam<sup>1,3</sup>,  
5 Masuda Akther<sup>1</sup>, J. Akter Puspo<sup>1</sup>, Salma Akter<sup>1,4</sup>, Azraf Anwar<sup>5</sup>, Munawar Sultana<sup>1</sup>, M. Anwar  
6 Hossain<sup>1,6\*\*</sup>

7  
8 <sup>1</sup>Department of Microbiology, University of Dhaka, Dhaka 1000, Bangladesh

9 <sup>2</sup>Department of Gynecology, Obstetrics and Reproductive Health, Bangabandhu Sheikh Mujibur  
10 Rahman Agricultural University, Gazipur-1706, Bangladesh

11 <sup>3</sup>Department of Microbiology, Jashore University of Science and Technology, Jashore 7408,  
12 Bangladesh

13 <sup>4</sup>Department of Microbiology, Jahangirnagar University, Savar, Dhaka-1342, Bangladesh

14 <sup>5</sup>Independent Researcher, 47-07 41st Street, New York, USA, Email: aa3641@columbia.edu

15 <sup>6</sup>Present address: Vice-Chancellor, Jashore University of Science and Technology, Jashore 7408,  
16 Bangladesh

17  
18 \*Equal contribution

19  
20 \*\*Corresponding to:

21  
22 M. Anwar Hossain, PhD  
23 Professor  
24 Department of Microbiology  
25 University of Dhaka, Dhaka 1000, Bangladesh  
26 E-mail: hossaina@du.ac.bd  
27  
28  
29  
30

31 **Abstract**

32 In order to explore nonsynonymous mutations and deletions in the spike (S) protein of  
33 SARS-CoV-2, we comprehensively analyzed 35,750 complete S protein gene sequences from  
34 across six continents and five climate zones around the world, as documented in the GISAID  
35 database as of June 24<sup>th</sup>, 2020. Through a custom Python-based pipeline for analyzing mutations,  
36 we identified 27,801 (77.77 % of spike sequences) mutated strains compared to Wuhan-Hu-1  
37 strain. 84.40% of these strains had only single amino-acid (aa) substitution mutations, but an  
38 outlier strain from Bosnia and Herzegovina (EPI\_ISL\_463893) was found to possess six aa  
39 substitutions. The D614G variant of the major G clade was found to be predominant across  
40 circulating strains in all climates. We also identified 988 unique aa substitution mutations  
41 distributed across 660 positions within the spike protein, with eleven sites showing high  
42 variability – these sites had four types of aa variations at each position. Besides, 17 in-frame  
43 deletions at four major regions (three in N-terminal domain and one just downstream of the  
44 RBD) may have possible impact on attenuation. Moreover, the mutational frequency differed  
45 significantly ( $p= 0.003$ , Kruskal–Wallis test) among the SARS-CoV-2 strains worldwide. This  
46 study presents a fast and accurate pipeline for identifying nonsynonymous mutations and  
47 deletions from large dataset for any particular protein coding sequence and presents this S  
48 protein data as representative analysis. By using separate multi-sequence alignment with  
49 MAFFT, removing ambiguous sequences and in-frame stop codons, and utilizing pairwise  
50 alignment, this method can derive nonsynonymus mutations (Reference:Position:Strain). We  
51 believe this will aid in the surveillance of any proteins encoded by SARS-CoV-2, and will prove  
52 to be crucial in tracking the ever-increasing variation of many other divergent RNA viruses in  
53 the future.

54 **Key Words:** SARS-CoV-2, Spike (S) Protein, Mutations, Geography, Climate

## 55 **1. Introduction**

56 Mutations in the viral genomes serve as the building blocks of viral evolution, and remain  
57 the main reason for the novelty in evolution (Baer, 2008; Duffy, 2018). In most cases, mutations  
58 are not beneficial for the organisms developing them, and lead to them having fewer descendants  
59 over time. Thus, a large portion of mutations, either at nucleotides (nt) and/or change in amino-  
60 acids (aa) levels, are harmful (Loewe and Hill, 2010). RNA viruses like SARS-CoV-2 generally  
61 have higher mutation rates; in them, however, these mutations are correlated with differential  
62 virulence, evolving ability, and traits considered beneficial for viruses (Duffy, 2018; Islam et al.,  
63 2020). SARS-CoV-2's inherently high mutation rate has already produced many descendants  
64 from the original Wuhan strain; this complicates its genotyping. The ability of the structural  
65 proteins (spike protein especially) in different strains of the SARS-CoV-2 to undergo rapid  
66 changes have enabled their genomes to emerge in novel hosts, escape vaccine-induced immunity,  
67 and evolve in diverse geo-climatic conditions (Duffy, 2018; Islam et al., 2020; Loewe and Hill,  
68 2010). Moreover, spontaneous mutation is a key parameter in modelling the genetic structure,  
69 and evolution of populations (Drake and Holland, 1999). Therefore, investigation of the  
70 increased rate of synonymous mutations in the SARS-CoV-2 genomes could be an important  
71 tool in assessing the genetic health of populations.

72 SARS-CoV-2 comprises of four major structural proteins— specifically Spike (S)  
73 glycoproteins, envelope (E) proteins, membrane (M) proteins, and nucleocapsid (N) proteins  
74 (Ahmed et al., 2020; Rahman et al., 2020; Wu et al., 2020). The entry of SARS-CoV-2 into the  
75 host cells is mediated by the transmembrane S protein which consists of two functional subunits  
76 responsible for binding to the host cell receptor (S1 subunit), and for fusing the viral and cellular  
77 membranes (S2 subunit) (Walls et al., 2020). The higher antigenic and surface exposure

78 properties of the S protein facilitate the attachment and entry of viral particles into the host cells  
79 through the host angiotensin-converting enzyme 2 (ACE2) receptor (Grant et al., 2020; Shang et  
80 al., 2020; Zhou et al., 2019). Therefore, the spike contains highest variations and determines, to  
81 some extent, the viral host range (Coutard et al., 2020; Wu et al., 2020). Furthermore, the S  
82 protein is the main target of neutralizing antibodies (Abs) upon infection, and is thus one of the  
83 most important structures for therapeutics and vaccine design (Rahman et al., 2020; Walls et al.,  
84 2020).

85 The continuing rapid transmission, and global spread of COVID-19 have raised  
86 intriguing questions regarding the evolution and adaptation of SARS-CoV-2 in diverse  
87 geographic and climatic conditions driven by synonymous mutations, deletions and/or  
88 replacements (Bal et al., 2020; Islam et al., 2020; Pachetti et al., 2020). The capability of the  
89 different strains of SARS-CoV-2 strains for swiftly adapting to diverse environments could be  
90 linked with their geographic distributions. Though not yet well-studied, evidence suggests that  
91 the transmission of SARS-CoV-2 infections and per day mortality rate from this infection is  
92 positively associated with weather conditions, and the diurnal temperature range (DTR) (Brassey  
93 et al., 2020; Su et al., 2016). However, the exact role of geo-climatic conditions on SARS-CoV-2  
94 is unknown, but it would be worth keeping in mind that this novel disease originated from  
95 wildlife before spreading to humans (Harvey, 2020). Therefore, genomic mutation analysis of  
96 SARS-CoV-2 strains, integrated with geographic and climatic data, would provide a fuller  
97 understanding of the origin, dispersal and dynamics of the evolving SARS-CoV-2 virus.  
98 Although several reports predicted possible adaptations at the nucleotide and aa-level, along with  
99 structural heterogeneity in viral proteins, especially in the S protein (Armijos-Jaramillo et al.,  
100 2020; Islam et al., 2020; Phan, 2020; Sardar et al., 2020), most of these studies were carried out

101 few complete representative genomes from a limited geographic area. As the genome number is  
102 increasing day by day, regular in-house monitoring of the crucial components such as the S  
103 protein is urgently necessary to understand the genomic basis and evolution of the diagnostic  
104 RT-PCR primer. There are a few pipelines (Yin, 2020) and websites  
105 ([https://mendel.bii.astar.edu.sg/METHODS/corona/beta/MUTATIONS/hCoV19\\_Human\\_2019\\_](https://mendel.bii.astar.edu.sg/METHODS/corona/beta/MUTATIONS/hCoV19_Human_2019_WuhanWIV04/hCoV-19_Spike_new_mutations_table.html)  
106 [WuhanWIV04/hCoV-19\\_Spike\\_new\\_mutations\\_table.html](https://mendel.bii.astar.edu.sg/METHODS/corona/beta/MUTATIONS/hCoV19_Human_2019_WuhanWIV04/hCoV-19_Spike_new_mutations_table.html)) in GSAID where aa change or  
107 substitution can be observed. In order to provide an alternative tool with a wider range of  
108 functions, we present an easy, rapid pipeline that will assist in the alignment of large volumes of  
109 viral genomes, remove low quality sequences and in-frame stop codons and provide in-house  
110 non-synonymous mutation analysis of large volumes of sequences while requiring minimal  
111 knowledge of the command line. This tool can perform this analysis for any other proteins as  
112 required. This study aimed to investigate the mutational spectra of aa utilizing this novel  
113 methodology in the S proteins in 35,750 complete genome sequences of the SARS-CoV-2  
114 belonging to 135 countries and/regions, and five climatic zones around the world, retrieved from  
115 the global initiative on sharing all influenza data (GISAID) (<https://www.gisaid.org/>) up to June  
116 24, 2020 (Supplementary Data 1).

117

## 118 **2. Methodology**

### 119 **2.1 Genomic data collection, and processing**

120 To decipher the genetic variations of the S glycoprotein, we retrieved 53,981 complete  
121 (or near-complete) genome sequences of SARS-CoV-2, available at the global initiative on  
122 sharing all influenza data (GISAID) (<https://www.gisaid.org/>) up to June 24, 2020. These  
123 sequences belonged to infected patients from 135 countries and/or regions from across six

124 continents (Supplementary Data 1). Using pyfasta (<https://github.com/brentp/pyfasta>), we split  
125 the total genome into 6 separate files having around 8,900 sequences in each. We aligned each  
126 file through the MAFFT (maximum limit 10,000 sequences) online server  
127 ([https://mafft.cbrc.jp/alignment/server/add\\_fragments.html?frommanual](https://mafft.cbrc.jp/alignment/server/add_fragments.html?frommanual)) using default  
128 parameters (Kato et al., 2002). The complete genome sequence of SARS-CoV-2 Wuhan-Hu-1  
129 strain (Accession NC\_045512, Version NC\_045512.2) was used as a reference genome.

130

## 131 **2.2 Mutational frequency analysis**

132 MEGA 7 was used to differentiate the spike protein of SARS-CoV-2 from multiple  
133 sequence alignment (Kumar et al., 2016). Sequence cleaner  
134 (<https://github.com/metageni/Sequence-Cleaner>) with set parameters of minimum length  
135 (m=3822), percentage N (mn=0), keep\_all\_duplicates, and remove\_ambiguous was employed to  
136 remove all ambiguous, and low-quality sequences. We utilized SeqKit toolkit (seqkit grep -s -p  
137 "-" in.fa > out.fa) to apprehend gap containing strains for deletion analysis (Shen et al., 2016).  
138 Internal stop codon containing sequences were removed by using SSequence DATaset builder  
139 (SEDA; <https://www.sing-group.org/seda/>). Amino-acid mutation analysis was done with bio-  
140 python program using pairwise alignment (<https://github.com/SShaminur/Mutation-Analysis>).  
141 The custom Venn diagrams (<http://bioinformatics.psb.ugent.be/webtools/Venn/>) server was used  
142 to make the Venn diagrams, and visualize the data. Swiss-Model, a structure homology-  
143 modelling server (<https://swissmodel.expasy.org/>) was used to predict the 3D structure (template,  
144 PDB ID:6VSB) of the S protein of the reference genome and the structure was visualized in  
145 PyMOL (DeLano, 2002; Rahman et al., 2020; Waterhouse et al., 2018). Furthermore, we divided  
146 the S glycoprotein mutation of SARS-CoV-2 data according to their geographic origins from six

147 continents - Europe, Asia, North America, South America, Africa, and Australia, and five related  
148 climatic zones - temperate, tropical, diverse, dry and continental (Kissler et al.). To estimate the  
149 case fatality (mortality) rates of SARS-CoV-2 infections, we collected information on total  
150 infected cases, and total reported deaths in these countries from the World Health Organization  
151 (WHO) COVID-19 Reports up to June 12, 2020 (WHO Reports, 2020). Microsoft Excel 2016  
152 was used for all the statistical analyses (David, 2017). Detailed step by step methods are  
153 described in Mutation\_analysis.pdf (<https://github.com/SShaminur/Mutation-Analysis>).

154

### 155 **3. Results and discussions**

#### 156 **3.1 Genomic data collection and processing**

157 Trimming low quality, ambiguous and non-human host RNA sequences resulted in  
158 35,750 (66.23 %) cleaned and full length S protein sequences (Supplementary Data 1). These  
159 sequences belonged to 135 countries and/or regions of from six continents (Europe, Asia, North  
160 America, South America, Africa, and Australia), and five major climatic zones (temperate,  
161 tropical, diverse, dry and continental) around the world (Supplementary Data 1). European  
162 countries and/or regions had the highest percentage (58.90%) of S protein sequences, followed  
163 by North American (25.78%), Asian (9.34%), Australian (3.61%), South American (1.21%), and  
164 African (1.18%) countries or regions. On the other hand, the temperate climatic zone covered the  
165 majority of these S protein sequences (60.18%), followed by diverse (33.08%), continental  
166 (3.25%), tropical (2.81%), and dry (0.69%) climatic conditions (Supplementary Data 1). We  
167 selected the complete genome sequence SARS-CoV-2 Wuhan-Hu-1 strain (Accession  
168 NC\_045512, Version NC\_045512.2) as a reference genome. Through synonymous mutations

169 analysis, we found 27,801 (77.77 %) mutated strains of the SARS-CoV-2 in the cleaned  
170 sequences (n= 35,750). Furthermore, country or region-specific aa change patterns revealed the  
171 highest number of mutated SARS-CoV-2 strains in England (7,067) followed by USA (6,501),  
172 Wales (3,002), Scotland (1,463), Netherlands (1,194), Australia (681), Belgium (596), and  
173 Denmark (582) (Supplementary Data 1).

### 174 **3.2 Screening for mutational evolution throughout S protein**

175 Our mutational analyses revealed a total of 988 unique amino acid (aa)  
176 change(s)/substitution(s) distributed across 660 unique positions in the S glycoprotein  
177 (Supplementary Data 2). The primary structure of the S-protein is 1274 aa, of them 51.81% aa  
178 positions (n=660) undergo aa-level evolution worldwide. We found eleven highly variable sites  
179 (Position: 32, 142, 146, 215, 261, 477, 529, 570, 622, 778, 791, 1146, 1162) showing four types  
180 of aa variations in a single position (Table 1). We also found that positions 52, 185 and 410 in  
181 the S glycoprotein had aa variation numbers of 3, 2 and 1, respectively (Fig. 1c, Table 1,  
182 Supplementary Data 2). Notably, position 614 showed two variants, substitution D614G  
183 (Aspartic acid  $\square$  Glycine) found in  $\square$ 74.82 % (n=26,749) of the cleaned sequences ( $\square$ 96.22% of  
184 the mutated sequences), and another variant D614N (Aspartic acid  $\square$  Asparagine) observed only  
185 in four strains from England and Wales (EPI\_ISL\_439400, EPI\_ISL\_443658 and  
186 EPI\_ISL\_445498, EPI\_ISL\_472913). The variant D614G in the S protein has overcome the  
187 wild-type variant from China since its first appearance in Germany on January 28, 2020  
188 (Comandatore et al., 2020; Eaaswarkhanth et al., 2020; Kim et al., 2020; Trucchi et al., 2020).

189 A strain from Bosnia\_and\_Herzegovina (EPI\_ISL\_463893) had the highest number of aa  
190 changes/substitutions (n=6) at six positions (R246I, L276I, T430A, D614G, S750N, L922V) of S  
191 protein. Also, we found that 84.8 % (n=23,576) of the mutated sequences carried just a single aa



192 mutation throughout the S proteins. The remaining 13.44 %, 1.63 %, 0.11 % and 0.01 % of the  
193 mutated sequences contained 2, 3, 4 and 5 aa changes, respectively (Fig. 1b, Supplementary Data  
194 2). Moreover, no synonymous mutation was found in the full length S protein of 18 countries  
195 and/or regions including Anhui, Brunei, Cambodia, Changzhou, Chongqing, Foshan, Ganzhou,  
196 Guam, Hefei, Jiangxi, Jingzhou, Jiujiang, Lishui, Nepal, Philippines, Qatar, Yingtian, Yunnan.  
197 This indicates S protein homogeneity of these countries/regions with the reference sequence  
198 from Wuhan, China (Supplementary Data1).

199 The RBD region (Wrapp et., al 2020) (aa position: 338-530) showed nonsynonymous  
200 mutations at 82 different positions in 516 strains, whereas in the S1 site and S2 site, there were  
201 362 and 297 positional mutations, respectively. Moreover, in the furin cleavage site (R685 and  
202 S686), we also observed a nonsynonymous mutation (S686G) in a single strain  
203 (Russia/Krasnodar-63401/2020|EPI\_ISL\_428867|2020-03-11) (Fig. 1a). We also found aa  
204 substitutions at six positions within the RBD region that are directly involved in binding with  
205 ACE-2 receptor (Wang et al., 2020; Yuan et al., 2020) including N439K (Scotland, Romania),  
206 L455F (England), A475V (USA, Australia), and F456L, Q493L and N501Y (USA)  
207 (Supplementary Data 2). All these mutations were found between March and April at a lower  
208 frequency (N439K with maximum frequency in 41 Scottish strains and one Romanian strain),  
209 except Q493L found in two USA strains reported in May. Q493R position showed variation in  
210 an English strain (EPI\_ISL\_470150) found in April. Furthermore, 18 substitutions at fourteen  
211 positions, previously reported to interact with anti-SARS-CoV-2 antibody (Yuan et al., 2020),  
212 were found in the strains from Bangladesh, England, Portugal, Wales, Shanghai, France, USA,  
213 Scotland, Russia, Latvia, Netherlands, South Africa, Bosnia and Herzegovina, Belgium, Bosnia  
214 and Australia (Supplementary Data 2) during the time frame March to May. Discontinuation of

215 the mutants globally may be linked to reduction of virus pathogenicity and virulence fitness  
216 affecting transmission dynamics. However, the unavailability of these variants may result due to  
217 rejection of the variants with a lower ratio when generating the final consensus sequences as well  
218 as insufficient sequences reporting from unusual asymptomatic patients. Moreover, eight  
219 glycosylated sites of S protein underwent aa conversions including three substitutions in the  
220 NTD region (N17K, N74K, N149H), including a total five substitutions at four sites in the S1  
221 region (N17K, N74K, N149H, N603S, N603K) and four mutations in the S2 region (N717T,  
222 N1074D, N1158S, N1194S) (Watanabe et al., 2020). Furthermore, a total of 50 aa substitutions  
223 within the S protein observed that incorporated asparagine (N) in S-protein of SARS-CoV-2  
224 including seven within the RBD region (S359N, K378N, K417N, K458N, S477N, T523N and  
225 K529N) (Supplementary Data 2). These substitutions alter glycosylation sites and its nature,  
226 though it needs further investigations. Overall, the aa substitutions related to asparagine in the  
227 RBD (ACE binding domain) and/or in S1/2 domains nearer to the glycosylated sites may affect  
228 the glycosylation shield, folding of S protein, host-pathogen interactions, viral entry and finally  
229 immune modulation, thus affecting antibody recognition and viral pathogenicity (Ou et al., 2020;  
230 Watanabe et al., 2020).

### 231 **3.3 Deletion analysis of SARS-CoV-2 S glycoprotein**

232 Besides site-specific mutations, our analysis revealed 17 in-frame deletions of ranged  
233 nucleotides across the SARS-CoV-2 S protein sequences originating from different countries  
234 worldwide (Table 2, Supplementary Data 2). Notably, we considered the deletions that occurred  
235 in at least two strains at a certain position as deletions. All of the identified deletions distributed  
236 throughout the nucleotide sequence 200-2035 fall into four major regions of S protein i.e. nt-  
237 position ranges 179-226 (61-76 aa: NVTWFHAIHVSGTNGT), 413-433 (138-144 aa:

238 DPFFLVGY), 724-732 (241-244: LLAL) and 2021-2035 (675-679 aa: QTQTN). Amino acid  
239 deletions at positions 61-76, 138-144, and 241-244 are near the RBD region. Among them,  
240 deletions of positions 61-76 and 141-144 are surface exposed, but 241-244 are situated at the  
241 inner surface of the predicted S protein (Fig. 2). Also, deleted aa at positions 675-679 are located  
242 in the C-terminal transmembrane domain of S protein. Surface exposed deletions near the RBD  
243 region may have significant impact on host-pathogen interaction and immune modulation.

244         Among the deletions, nucleotide deletion positioned at 418-433 (aa position 140-144)  
245 faced frequent overlapped deletions among strains of multiple countries (Table 2). Notably, a  
246 single aa in-frame deletion of nucleotides positioned 429-431 (aa position 145) with the highest  
247 frequency in 48 strains from multiple countries and/or regions including Australia, England,  
248 Canada, Slovenia, Jordan, Netherlands, Saudi\_Arabia, Scotland, USA, Spain, Wales and India. A  
249 strain from Taiwan (EPI\_ISL\_444275) showed two coevolving deletions at nt positions 200-226  
250 (68-76 aa:IHVSGTNGT) and nt positions 2021-2035 (675-679 aa:QTQTN). Moreover, two  
251 deletions at nt positions 418-420 (140 aa:F) and 727-732 (243-244 aa:AL) were coevolved in a  
252 Sichuan strain (EPI\_ISL\_451369). No other strain had such coevolving deletions, thereby  
253 indirectly indicating the negative impact of the deletions on virus fitness and human to human  
254 transmissibility. Noteworthy, a 5-aa deletion (675-679 aa: QTQTN) at the upstream of the  
255 polybasic cleavage site of S1-S2, and a 21-nt deletion 23596–23617 (aa- NSPRRAR) including  
256 the polybasic cleavage site in clinical samples and cell-isolated virus strain likely benefit the  
257 SARS-CoV-2 replication or infection in vitro and under strong purification selection in vivo (Liu  
258 et al., 2020). Moreover, attenuated SARS-CoV-2 variants with 15-30-bp deletions (Del-mut) at  
259 the S1/S2 junction were reported to show less virulence in an animal model (Lau et al., 2020).

260           These deletions may affect viral adaptations to human, virus-host interactions for  
261 infections, attenuation, pathogenicity, and immune-modulations by potentially influencing the  
262 tertiary structures and functions of the associated proteins (Phan, 2020). However, further studies  
263 are required for the mechanistic clarification and functional implication of these deletions in the  
264 SARS- CoV-2 S glycoprotein. The deletion mutations identified in this study should be also  
265 considered for current vaccine development.

### 266 **3.4 Geo-climatic scenario of amino-acid changes in the spike protein of SARS-CoV-2, and** 267 **associated disease severity**

268           Considering geo-climatic impacts on aa changes in the S protein of the SARS-CoV-2, we  
269 sought to determine the possible residue positions, and total number of mutations in the S protein  
270 gene sequences from 135 countries and/or territories and five climatic zones worldwide. Eight  
271 hundred and eighty-eight (988) unique aa replacements across 660 positions along the S protein  
272 were identified which differed significantly ( $p= 0.003$ , Kruskal–Wallis test) among the genomes  
273 of SARS-CoV-2. We found that the frequency of aa changes in the S protein remained  
274 substantially higher in the SARS-CoV-2 genome sequences of Europe (62.02%), followed by  
275 North America (25.50%), Asia (6.83%), Australia (2.89%), South America (1.41%), and Africa  
276 (1.35%) (Supplementary Data 1). Among these replacements, only one aa residue at position 5  
277 (L5F) and 614 (D614G) were found to be the common in Asia, Europe, North America, South  
278 America, Africa, and Australia (Fig. 2a). Moreover, 408, 127, 139, 17, 10, and 8 unique aa  
279 replacements, and 244, 146, 194, 61, 19, and 23 accessory aa replacements (mutations shared  
280 with at least two continents) were found in the SARS-CoV-2 genomes sequenced from Europe,  
281 Asia, North America, Australia, South America, and Africa, respectively (Fig. 3a,  
282 Supplementary Data 3). Higher unique mutations in European, Asian and American sequences

283 point out the geographical clustering predisposition of the virus. However, further phylogenic  
284 study targeting those unique and accessory mutations may lead to a better understanding of  
285 global phylodynamics, and thereby guiding the regional control strategy for the COVID-19  
286 pandemic.

287 This study also explores the non-synonymous mutations in the S protein of the SARS-  
288 CoV-2 genomes across five different climatic conditions worldwide. This revealed significant  
289 ( $p= 0.017$ , Kruskal–Wallis test) variations in mutation patterns. Our analysis showed that only  
290 two core aa substitutions at positions 614 (D614G) and 936 (D936Y) were shared across all the  
291 climatic zones (Fig. 3b). Similarly, 426, 231, 29, 29, and 1 unique aa replacement were found in  
292 the S protein sequences of the temperate, diverse, tropical, continental and dry climatic  
293 conditions, respectively. Moreover, 252, 239, 47, 76, and 14 residue positions in the S protein  
294 sequences were identified where nonsynonymous mutations occurred in at least two climatic  
295 zones (Fig. 3b, Supplementary Data 3). RNA viruses like SARS-CoV-2 might have remarkable  
296 capabilities to adapt to new environments, and confront different selective pressures they  
297 encounter (Watanabe et al., 2020).

298 The genomic variability of SARS-CoV-2 strains manifested by mutations in the spike  
299 protein scattered across the globe underly geographically specific etiological effects. One  
300 important effect of mapping mutations is the development of antiviral therapies targeting specific  
301 regions, for example the spike region of the SARS-CoV-2 genomes (Callaway, 2020). Our  
302 current findings corroborate the study completed by Deshwal (2020), who reported the highest  
303 SARS-CoV-2 infections and case fatality rates in European countries. In another study, Pachetti  
304 et al. (2020) reported two non-synonymous mutations (R203K and L3606F) that were shared  
305 across ORFs of the SARS-CoV-2 genomes of six continents, and co-occurrence mutations were

306 also common in different countries along with unique mutations. Nevertheless, mutations in the  
307 structural proteins of the SARS-CoV-2, especially in the spike proteins, are driven by the  
308 geographic locations that diverged differently, possibly due to the environment, demography,  
309 and the low fidelity of reverse transcriptase (Brassey et al., 2020; Pachetti et al., 2020; Su et al.,  
310 2016).

311 Investigating the continental and/or regional impacts of aa substitutions in the SARS-  
312 CoV-2 genomes, we found higher case fatality rates in temperate European countries such as  
313 United Kingdom (14.16%), Italy (11.72%), France (10.05%), Spain (9.31%), Belgium (3.30%),  
314 Germany (3.00%), Russia (2.30%), Netherlands (2.07%), Sweden (1.65%) and Turkey (1.63%)  
315 (Supplementary Data 3). Among the tropical Asian countries, higher mortality rates from SARS-  
316 CoV-2 infections were estimated in Iran (4.76%), India (4.72%), China (2.56%), Pakistan  
317 (1.38%), and Indonesia (1.11%), and rest of the countries had less than 1.0% case fatality rates.  
318 Moreover, in the diverse climatic conditions of the American countries or territories (both North  
319 and South Americans), United States of America (5.67%), and Brazil (5.14%) had relatively  
320 higher mortality rates from SARS-CoV-2 pandemics, and rest of the countries in these continents  
321 had substantially lower disease severity rates (< 1.0%). Case fatality or mortality rates from  
322 SARS-CoV-2 infections in rest of the two continents (Africa and Australia) remained much  
323 lower, and only 2.19%, 1.40%, and 1.26% death rates were found in South Africa, Australia, and  
324 Algeria, respectively. The rest of the countries and/or territories of these two continents had less  
325 than 1.0% mortality rates (Supplementary Data 3).

326 The predominantly higher mortality rates in European temperate countries might be  
327 correlated with higher unique mutations found in the S proteins reported from this climate. Thus,  
328 our present study revealed that the predicted rates of unique aa changes in the European

329 sequences could be associated with higher pathogenicity of the virus. However, it is worth noting  
330 that reported disease severity (may not represent the actual severity) might be affected by several  
331 other factors like health care facilities, average age group and genetic context of the population  
332 and control strategies adopted by the countries. Irrespective of the significance of geography for  
333 emerging infectious disease epidemiology, the effects of global mobility upon the genetic  
334 diversity and molecular evolution of SARS-CoV-2 are under-appreciated and only beginning to  
335 be understood. The recent monograph on the spatial epidemiology of COVID-19 makes no  
336 reference to the genetic disparity of SARS-CoV-2 (Brassey et al., 2020; Harvey, 2020; Pachetti  
337 et al., 2020; Su et al., 2020).

### 338 **3.5 Pipeline validations**

339 The SARS-CoV-2 genomes are increasing very rapidly in the Global initiative on sharing  
340 all influenza data (GISAID), but not all genomes are of high quality or complete. So,  
341 nonsynonymous mutation analysis with particular crucial part of the virus like S or other  
342 structural protein gives statistically more significant insights rather considering the complete  
343 genome of the SARS-CoV-2 virus. In this study, we found 33.77 % (18,231/53,981) sequences  
344 are in low quality or having ambiguous sequences. Sequence cleaner has removed those  
345 sequences and give us cleaned sequences. Among them, we found ten in frame stop codon  
346 containing sequences and we have removed it using SEDA. SeqKit toolkit were used to arrest  
347 gap containing sequences, and we found around 453 sequences from there, we have to carefully  
348 checked the in-frame deletion and 103 strains contains in frame deletions. SNP-sites is a very  
349 efficient tools for nucleotide variation detection in different format like multi-fasta alignment,  
350 variant call format (VCF), and relaxed phylip format (Page et al., 2016; Seemann, 2015) but this  
351 tool is highly dedicated for nucleotide. Snippy (Seemann, 2015) is another tool where nucleotide

352 and protein variation can also be detected, but for large data set with ambiguous sequences will  
353 require a separate processing to entrust more accurate results. Here we will get the  
354 nonsynonymous mutation that alter aa results in a file format (Sequence\_ID  
355 Reference\_amino\_acid:Mutation\_Position:Strain\_amino\_acid) that will assist in the downstream  
356 analysis like unique mutation, unique position mutation, mutational frequency, strains having  
357 number of mutation. For deletion analysis, this pipeline helps in decreasing the size of sequences  
358 (just 453 sequences from 53,981 sequences) for deletion analysis.

359

#### 360 **4. Conclusions**

361 Analyses of genome sequences of 30,493 SARS-CoV-2 strains from across 135 countries  
362 and/or regions, and five climatic conditions worldwide revealed the presence of synonymous and  
363 non-synonymous mutations, deletions and/or replacements at different positions of the S protein  
364 gene, which was reflected in the S-protein primary sequence. These findings of previously  
365 unreported mutations in the spike protein of SARS-CoV-2 genomes suggest that the virus is  
366 evolving, and European, North American and Asian strains might coexist, each of them  
367 characterized by a different mutation patterns, and associated case fatality rates. Moreover, the  
368 geo-climatic distribution of the mutations in the spike deciphered higher mutations rates as well  
369 as disease severity in the European temperate countries. Furthermore, the structural validations  
370 of the mutations in the reference genomes of Wuhan-Hu-1 strain further validated the results of  
371 our current study. However, there is no experimental evidence to suggest a difference in  
372 aggressiveness of such mutations amongst the studied genome sequences. Moreover, the geo-  
373 climate effects of the observed mutations in the spike protein of SARS-CoV-2 on the properties  
374 of the diverse strain variants are yet to be evaluated in clinical or experimental studies.



375 Therefore, these results need to be interpreted cautiously given the existing uncertainty about  
376 SARS-CoV-2 genomic data to develop potential prophylaxis and mitigation for tackling the  
377 pandemic COVID-19 crisis. So, the pipeline developed will help in the easy and accurate way  
378 investigate the nonsynonymous mutation, frequency, deletion analysis from large number of data  
379 with a shortest possible time without having knowledge of much bioinformatics.

380

381

382

383

384

385

386

387

388

389

390

391

392

393

394

395

396

397

398 **Figures**

399

400

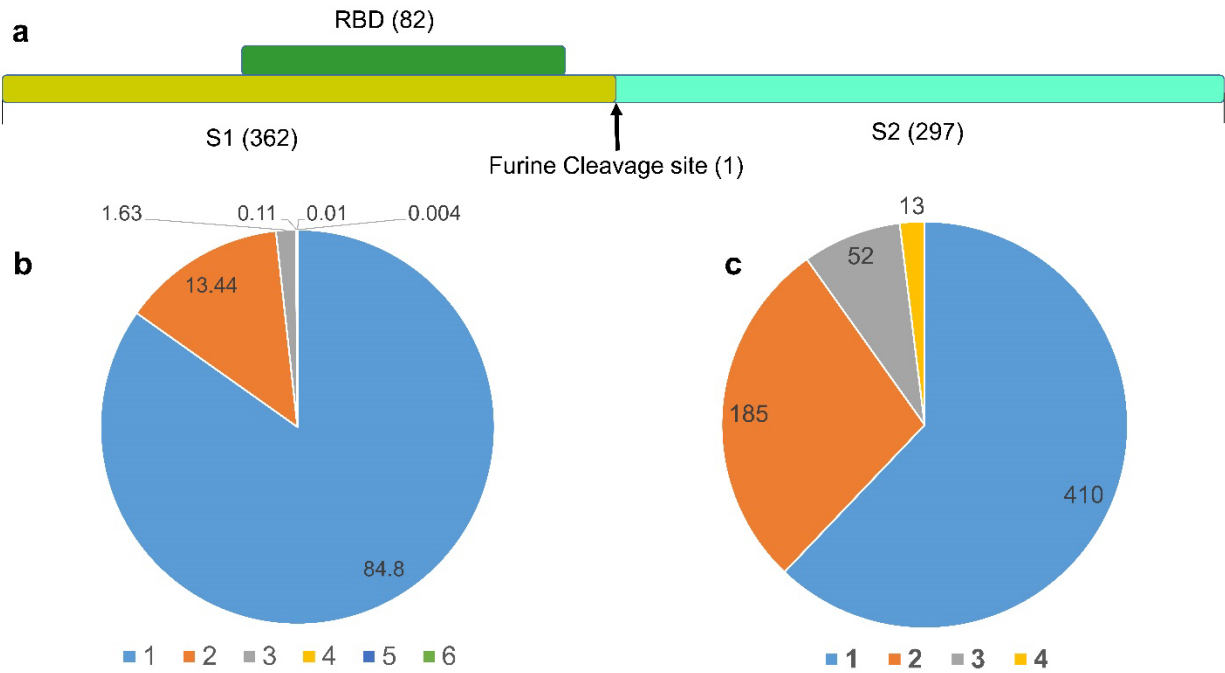

401

402 **Fig. 1: Mutational frequency and distribution of S glycoprotein of SARS-CoV-2. (a)**

403 Represents different structural regions in spike protein where aa mutations occurred worldwide.

404 The receptor binding domain (RBD) had 82 positions where aa mutations were found whereas

405 the S1 and S2 subunits have 362 and 297 positions for aa mutation, respectively. The furin

406 cleavage site (R685, S686) also possessed one mutation (S686G) in of the Russian SARS-CoV-2

407 strains (EPI\_ISL\_428867). **(b)** Denotes the number of mutations in different strains of SARS-

408 CoV-2 where 1, 2, 3, 4, 5 and 6 codes for one, two, three, four, five and six different types of aa

409 mutations across the studied strains. In this study, most of the strains (84.40%) had single aa

410 variation while 13.44%, 1.63%, 0.11% and 0.01% sequences harbored 2, 3, 4 and 5 aa mutations,

411 respectively. **(c)** Positional aa variations in S protein of SARS-CoV-2 where 1, 2, 3 and 4

412 represent the aa variation in one, two, three and four different positions. 13 positions in the  
413 protein were found to having 4 types of aa variations, and 52, 185 and 410 positions in the spike  
414 undergone to three, two and one type of aa variations, respectively.

415

416

417

418

419

420

421

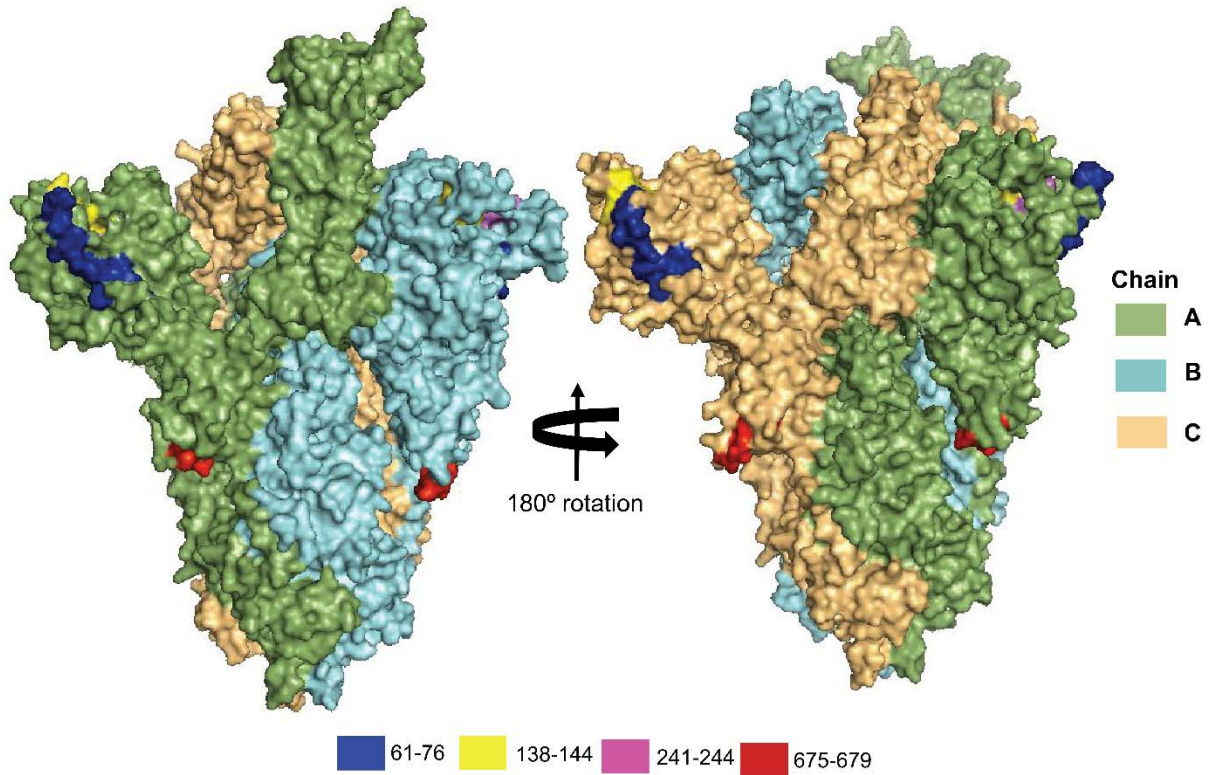

422

423

424 **Fig. 2:** The four amino acids deleted positions (61-76, 138-144, 241-244, and 675-679) in the  
425 spike (S) protein of the reference genome, SARS-CoV-2 Wuhan-Hu-1 strain (Accession  
426 NC\_045512, Version NC\_045512.2). The positions are visualized in the tertiary (3D) structure  
427 of S protein in PyMOL.

428

429

430

431

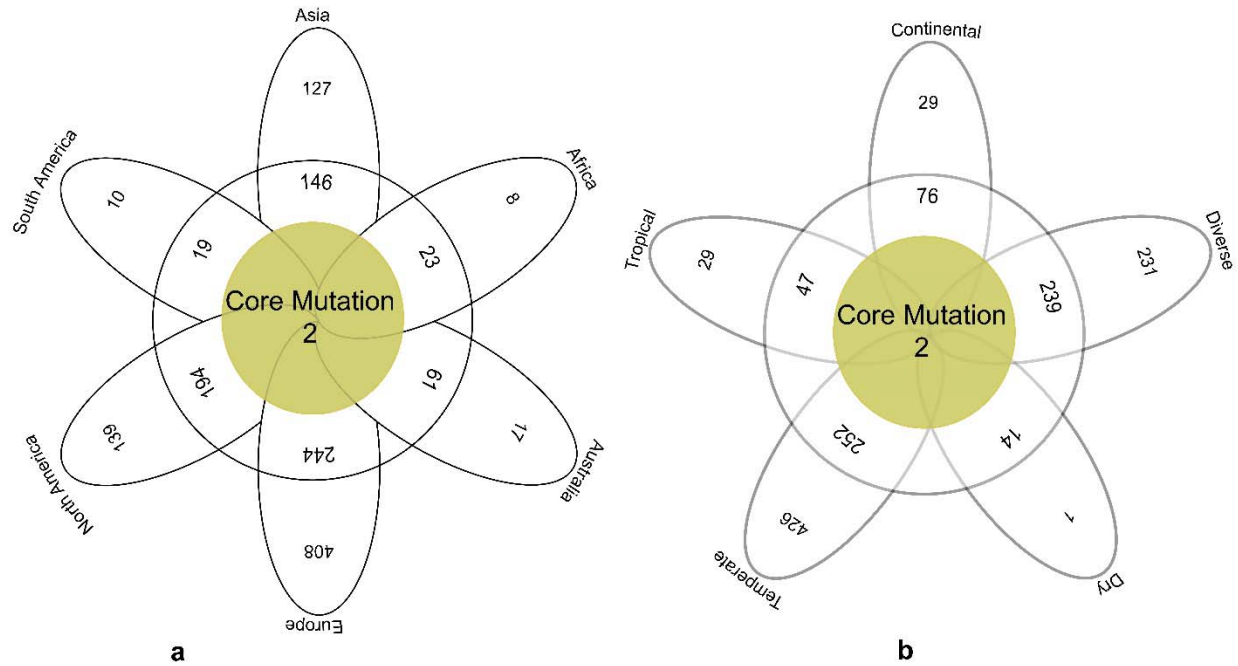

432

433 **Fig. 3: The frequency spectra of amino-acid mutations in the spike protein of SARS-CoV-2.**

434 Amino-acid (aa) mutations are represented according to (a) geographic areas and (b) different  
435 climate zones. We found two core shared aa mutation at residue position 5 (L5F) and 614  
436 (D614G) in Asia, Europe, Africa, Australia, North America, and South America, and two core  
437 shared mutations at residue positions of 614 (D614G), and 936 (D936Y) in continental, diverse,  
438 dry, tropical and temperate climatic conditions. In both cases (a and b), the middle brown circles  
439 represent frequency of aa substitutions shared by all variables, and the frequency of aa  
440 substitutions shared by at least two continents/climate zones are shown in white circle. The white  
441 colored outer ribbons represent unique aa mutations in each individual region and climate zone.

442

443

444

445

446 **Table 1** Amino acid variations of S glycoprotein according to their positions. Here, the position  
 447 where variation more than two aa variations found are represented.

448

| Position in S | No. of variations | Name of Amino Acid                | Position in S | No. of variations | Name of Amino Acid  |
|---------------|-------------------|-----------------------------------|---------------|-------------------|---------------------|
| 32            | 4                 | F32L, F32Y, F32I, F32V            | 273           | 3                 | R273M, R273K, R273S |
| 142           | 4                 | G142D, G142A, G142V, G142S        | 354           | 3                 | N354D, N354K, N354S |
| 146           | 4                 | H146Q, H146N, H146Y, H146R        | 414           | 3                 | Q414R, Q414K, Q414P |
| 215           | 4                 | D215Y, D215H, D215G, D215N        | 468           | 3                 | I468F, I468T, I468V |
| 261           | 4                 | G261V, G261S, G261D, G261R        | 483           | 3                 | V483F, V483I, V483A |
| 477           | 4                 | S477I, S477N, S477R, S477G        | 558           | 3                 | K558N, K558Q, K558R |
| 529           | 4                 | K529M, K529N, K529R, K529E        | 615           | 3                 | V615I, V615F, V615L |
| 570           | 4                 | A570S, A570V, A570D, A570T        | 654           | 3                 | E654D, E654Q, E654K |
| 622           | 4                 | V622F, V622L, V622I, V622A, A623V | 675           | 3                 | Q675H, Q675R, Q675K |
| 778           | 4                 | T778S, T778A, T778N, T778I        | 677           | 3                 | Q677H, Q677R, Q677Y |
| 791           | 4                 | T791I, T791A, T791K, T791P        | 681           | 3                 | P681H, P681L, P681S |
| 1146          | 4                 | D1146Y, D1146H, D1146E, D1146N    | 684           | 3                 | A684V, A684T, A684S |
| 1162          | 4                 | P1162L, P1162T, P1162A, P1162S    | 747           | 3                 | T747A, T747I, T747N |
| 19            | 3                 | T19P, T19I, T19S                  | 750           | 3                 | S750N, S750R, S750I |
| 21            | 3                 | R21I, R21T, R21K                  | 752           | 3                 | L752I, L752R, L752F |
| 22            | 3                 | T22N, T22I, T22A                  | 765           | 3                 | R765L, R765H, R765C |
| 26            | 3                 | P26L, P26S, P26R                  | 772           | 3                 | V772L, V772I, V772A |
| 27            | 3                 | A27V, A27T, A27S                  | 780           | 3                 | E780D, E780Q, E780V |
| 72            | 3                 | G72E, G72W, G72R                  | 812           | 3                 | P812S, P812T, P812L |
| 75            | 3                 | G75D, G75V, G75R                  | 831           | 3                 | A831S, A831V, A831T |
| 80            | 3                 | D80N, D80Y, D80A                  | 836           | 3                 | Q836H, Q836P, Q836L |

|     |   |                     |      |   |                           |
|-----|---|---------------------|------|---|---------------------------|
| 97  | 3 | K97E, K97N, K97R    | 838  | 3 | G838S, G838V, G838D       |
| 102 | 3 | R102S, R102I, R102G | 839  | 3 | D839Y, D839E, D839N       |
| 148 | 3 | N148Y, N148K, N148S | 845  | 3 | A845S, A845V, A845D       |
| 153 | 3 | M153T, M153I, M153V | 847  | 3 | R847T, R847I, R847K       |
| 183 | 3 | Q183H, Q183R, Q183L | 870  | 3 | I870S, I870T, I870V       |
| 218 | 3 | Q218R, Q218E, Q218L | 879  | 3 | A879S, A879V, A879T       |
| 222 | 3 | A222V, A222S, A222P | 930  | 3 | A930S, A930V, A930T       |
| 239 | 3 | Q239K, Q239R, Q239H | 1085 | 3 | G1085R, G1085E,<br>G1085L |
| 246 | 3 | R246I, R246K, R246S | 1129 | 3 | V1129L, V1129A,<br>V1129I |
| 247 | 3 | S247R, S247I, S247N | 1153 | 3 | D1153A, D1153H,<br>D1153Y |
| 251 | 3 | P251S, P251H, P251L | 1170 | 3 | S1170T, S1170Y,<br>S1170P |
| 263 | 3 | A263T, A263S, A263V |      |   |                           |

449

450

451

452

453

454

455

456 **Table 2** Deletion-sites observed across the S glycoprotein. Countries represent the origin of  
 457 strains where the deletions found. We considered the deletions that occurred in at least two  
 458 strains in a certain position.

| <b>Nucleotide positions</b> | <b>Amino acid positions</b> | <b>Deleted amino acid</b> | <b>Countries</b>                                                                                            | <b>No. of strains</b> |
|-----------------------------|-----------------------------|---------------------------|-------------------------------------------------------------------------------------------------------------|-----------------------|
| 179-217                     | 61-73                       | NVTWFHAIHVSGT             | England                                                                                                     | 1                     |
| 200-226                     | 68-76                       | IHVSGTNGT                 | Taiwan, Malaysia                                                                                            | 2                     |
| 201-224                     | 68-75                       | IHVSGTNG                  | Thailand                                                                                                    | 1                     |
| 203-208                     | 69-70                       | HV                        | Sweden, England, Australia                                                                                  | 3                     |
| 413-421                     | 138-140                     | DPF                       | Sweden                                                                                                      | 1                     |
| 418-420                     | 140                         | F                         | England, Sichuan                                                                                            | 3                     |
| 420-431                     | 141-144                     | LGVY                      | England, Iceland, USA, Scotland, Kenya                                                                      | 16                    |
| 420-422                     | 141                         | L                         | England                                                                                                     | 1                     |
| 422-430                     | 141-143                     | LGV                       | Portugal, England, Iceland, Scotland                                                                        | 4                     |
| 423-431                     | 142-144                     | GVY                       | England, Netherlands                                                                                        | 3                     |
| 428-430                     | 143                         | V                         | USA, Belgium                                                                                                | 4                     |
| 428-433                     | 143-144                     | VY                        | England                                                                                                     | 2                     |
| 429-431                     | 145                         | Y                         | England, Canada, Slovenia, Jordan, Netherlands, Saudi_Arabia, Scotland, USA, Spain, Wales, India, Australia | 48                    |
| 724-732                     | 241-243                     | LLA                       | China, England, Belgium, Scotland, Netherlands                                                              | 6                     |
| 724-726                     | 241                         | L                         | USA                                                                                                         | 2                     |
| 727-732                     | 243-244                     | AL                        | England, Wales, Spain, Sichuan                                                                              | 6                     |
| 2021-2035                   | 675-679                     | QTQTN                     | Taiwan, Malaysia                                                                                            | 2                     |

459



460 **Conflicts of Interest Statement**

461  
462 The authors of this manuscript declare that they have no conflict of interest.

463  
464 **Acknowledgements**

465 The authors sincerely appreciate the researchers worldwide who had deposited and  
466 shared the complete genomes data of SARS-CoV-2 and other coronaviruses to GISAID  
467 (<https://www.gisaid.org/>). This research utilized these precious data. The authors would also like  
468 to extend thanks to Geni Gueiros who was kind to modify his tools (Sequence cleaner) upon  
469 request from Md. Shaminur Rahman.

470  
471 **Data availability**

472 This study utilized the SARS-CoV-2 genome sequences retrieving from the publicly  
473 available open database, GISAID. Detailed step by step methods are described in  
474 Mutation\_analysis.pdf (<https://github.com/SShaminur/Mutation-Analysis>).

475  
476 **Author contributions**

477 MSR, MRI, MNH, ASMRUA, MA, JA, and SA conducted the overall study. MSR, MRI,  
478 and MNH drafted the manuscript. MNH finally compiled the manuscript. AA, MS, and MAH  
479 contributed intellectually to the interpretation and presentation of the results.

480  
481 **Supplementary Information**

482 Supplementary information supporting the findings of this study are available in this  
483 article as Supplementary Files, or from the corresponding author on request.

484

485 **References**

- 486 Ahmed, S.F., Quadeer, A.A., McKay, M.R., 2020. Preliminary identification of potential vaccine  
487 targets for the COVID-19 coronavirus (SARS-CoV-2) based on SARS-CoV  
488 immunological studies. *Viruses*, 12, 254.
- 489 Armijos-Jaramillo, V., Yeager, J., Muslin, C., Perez-Castillo, Y., 2020. SARS-CoV-2, an  
490 evolutionary perspective of interaction with human ACE2 reveals undiscovered amino  
491 acids necessary for complex stability. *Evolutionary Applications*, DOI:  
492 10.1101/2020.03.21.001933.
- 493 Baer, C.F., 2008. Does mutation rate depend on itself. *PLoS Biology*, 6, e52.
- 494 Bal, A., Destras, G., Gaymard, A., Bouscambert-Duchamp, M., Valette, M., Escuret, V., Frobort,  
495 E., Billaud, G., Trouillet-Assant, S., Cheynet, V., 2020. Molecular characterization of  
496 SARS-CoV-2 in the first COVID-19 cluster in France reveals an amino acid deletion in  
497 nsp2 (Asp268del). *Clinical Microbiology and Infection*, 26(7), 960–962.
- 498 Brassey, J., Heneghan, C., Mahtani, K. R.& Aronson, J. K. 2020. Do weather conditions  
499 influence the transmission of the coronavirus (SARS-CoV-2)? Centre for Evidence-  
500 Based Medicine, Nuffield Department of Primary Care Health Sciences, University of  
501 Oxford, March 22, 2020.
- 502 Callaway, E., 2020. Coronavirus vaccines: five key questions as trials begin. *Nature* 579, 481.
- 503 Comandatore, F., Chiodi, A., Gabrieli, P., Biffignandi, G.B., Perini, M., Ramazzotti, M.,  
504 Ricagno, S., Rimoldi, S.G., Gismondo, M., Micheli, V., 2020. Identification of variable  
505 sites in Sars-CoV-2 and their abundance profiles in time. *bioRxiv*.
- 506 Coutard, B., Valle, C., de Lamballerie, X., Canard, B., Seidah, N., Decroly, E., 2020. The spike  
507 glycoprotein of the new coronavirus 2019-nCoV contains a furin-like cleavage site absent  
508 in CoV of the same clade. *Antiviral Research*, 176, 104742.

- 509 David, M., 2017. Statistics for managers, using Microsoft excel. Pearson Education India.
- 510 DeLano, W.L., 2002. The PyMOL molecular graphics system. <http://www.pymol.org>.
- 511 Drake, J.W., Holland, J.J., 1999. Mutation rates among RNA viruses. Proceedings of the  
512 National Academy of Sciences 96, 13910-13913.
- 513 Duffy, S., 2018. Why are RNA virus mutation rates so damn high? PLoS biology 16, e3000003.
- 514 Eaaswarkhanth, M., Al Madhoun, A., Al-Mulla, F., 2020. Could the D614 G substitution in the  
515 SARS-CoV-2 spike (S) protein be associated with higher COVID-19 mortality?  
516 International Journal of Infectious Diseases, 96, 459-460.
- 517 Grant, O.C., Montgomery, D., Ito, K., Woods, R.J., 2020. 3D Models of glycosylated SARS-  
518 CoV-2 spike protein suggest challenges and opportunities for vaccine development.  
519 bioRxiv. doi: <https://doi.org/10.1101/2020.04.07.030445>.
- 520 Harvey, C. What Could Warming Mean for Pathogens like Coronavirus? E&E News, March 9,  
521 (2020).
- 522 Islam, M.R., Hoque, M.N., Rahman, M.S., Puspo, J.A., Akhter, M., Akter, S., Rubayet-Ul-Alam,  
523 A., Sultana, M., Crandall, K.A., Hossain, M.A., 2020. Genome Wide Analysis of Severe  
524 Acute Respiratory Syndrome Coronavirus-2 Implicates World-Wide Circulatory Virus  
525 Strains Heterogeneity. Preprints 2020040137. doi: 10.20944/preprints202004.0137.v1.
- 526 Katoh, K., Misawa, K., Kuma, K.i., Miyata, T., 2002. MAFFT: a novel method for rapid  
527 multiple sequence alignment based on fast Fourier transform. Nucleic acids research 30,  
528 3059-3066.
- 529 Kim, J.-S., Jang, J.-H., Kim, J.-M., Chung, Y.-S., Yoo, C.-K., Han, M.-G., 2020. Genome-Wide  
530 Identification and Characterization of Point Mutations in the SARS-CoV-2 Genome.  
531 Osong Public Health and Research Perspectives 11, 101.

- 532 Kissler, S.M., Tedijanto, C., Goldstein, E., Yonatan, H., Grad, and Marc Lipsitch.  
533 2020. 'Projecting the Transmission Dynamics of SARS-CoV-2 through the Postpandemic  
534 Period'. *Science*, 368 (6493), 860-868.
- 535 Kumar, S., Stecher, G., Tamura, K., 2016. MEGA7: molecular evolutionary genetics analysis  
536 version 7.0 for bigger datasets. *Molecular Biology and Evolution* 33, 1870-1874.
- 537 Lau, S.-Y., Wang, P., Mok, B.W.-Y., Zhang, A.J., Chu, H., Lee, A.C.-Y., Deng, S., Chen, P.,  
538 Chan, K.-H., Song, W., 2020. Attenuated SARS-CoV-2 variants with deletions at the  
539 S1/S2 junction. *Emerging Microbes & Infections* 9, 837-842.
- 540 Liu, Z., Zheng, H., Yuan, R., Li, M., Lin, H., Peng, J., Xiong, Q., Sun, J., Li, B., Wu, J., 2020.  
541 Identification of a common deletion in the spike protein of SARS-CoV-2. *bioRxiv*.
- 542 Loewe, L., Hill, W.G., 2010. The population genetics of mutations: good, bad and indifferent.  
543 *The Royal Society*, 365(1544), 1153–1167.
- 544 Ou, X., Liu, Y., Lei, X., Li, P., Mi, D., Ren, L., Guo, L., Guo, R., Chen, T., Hu, J., 2020.  
545 Characterization of spike glycoprotein of SARS-CoV-2 on virus entry and its immune  
546 cross-reactivity with SARS-CoV. *Nature Communications*, 11, 1-12.
- 547 Pachetti, M., Marini, B., Benedetti, F., Giudici, F., Mauro, E., Storici, P., Masciovecchio, C.,  
548 Angeletti, S., Ciccozzi, M., Gallo, R.C., 2020. Emerging SARS-CoV-2 mutation hot  
549 spots include a novel RNA-dependent-RNA polymerase variant. *Journal of Translational  
550 Medicine* 18, 1-9.
- 551 Page, A.J., Taylor, B., Delaney, A.J., Soares, J., Seemann, T., Keane, J.A., Harris, S.R., 2016.  
552 SNP-sites: rapid efficient extraction of SNPs from multi-FASTA alignments. *Microbial  
553 Genomics* 2, 2(4), e000056.

- 554 Phan, T., 2020. Genetic diversity and evolution of SARS-CoV-2. *Infection, Genetics and*  
555 *Evolution* 81, 104260.
- 556 Rahman, M.S., Hoque, M.N., Islam, M.R., Akter, S., Rubayet-Ul-Alam, A., Siddique, M.A.,  
557 Saha, O., Rahaman, M.M., Sultana, M., Hossain, M.A., 2020. Epitope-based chimeric  
558 peptide vaccine design against S, M and E proteins of SARS-CoV-2 etiologic agent of  
559 global pandemic COVID-19: an in silico approach. *bioRxiv*. doi:  
560 <https://doi.org/10.1101/2020.03.30.015164>.
- 561 Sardar, R., Satish, D., Birla, S., Gupta, D., 2020. Comparative analyses of SAR-CoV2 genomes  
562 from different geographical locations and other coronavirus family genomes reveals  
563 unique features potentially consequential to host-virus interaction and pathogenesis.  
564 *bioRxiv*. Seemann, T., 2015. Snippy: rapid haploid variant calling and core SNP  
565 phylogeny. Available. Shang, W., Yang, Y., Rao, Y., Rao, X., 2020. The outbreak of  
566 SARS-CoV-2 pneumonia calls for viral vaccines. *npj Vaccines* 5, 1-3.
- 567 Shen, W., Le, S., Li, Y., Hu, F., 2016. SeqKit: a cross-platform and ultrafast toolkit for  
568 FASTA/Q file manipulation. *PloS One* 11, e0163962. Su, S., Wong, G., Shi, W., Liu, J.,  
569 Lai, A.C., Zhou, J., Liu, W., Bi, Y., Gao, G.F., 2016. Epidemiology, genetic  
570 recombination, and pathogenesis of coronaviruses. *Trends in Microbiology* 24, 490-502.
- 571 Trucchi, E., Gratton, P., Mafessoni, F., Motta, S., Cicconardi, F., Bertorelle, G., D'Annessa, I.,  
572 Di Marino, D., 2020. Unveiling diffusion pattern and structural impact of the most  
573 invasive SARS-CoV-2 spike mutation. *bioRxiv*.
- 574 Walls, AC, Park YJ, Tortorici MA, Wall A, McGuire AT, Velesler D. 2020. Structure, function,  
575 and antigenicity of the SARS-CoV-2 spike glycoprotein. *Cell*, 181, 281-292.e6.

576 Wang, Q., Zhang, Y., Wu, L., Niu, S., Song, C., Zhang, Z., Lu, G., Qiao, C., Hu, Y., Yuen, K.-  
577 Y., 2020. Structural and functional basis of SARS-CoV-2 entry by using human ACE2.  
578 Cell, 181(4), 894-904.e9.

579 Watanabe, Y., Allen, J.D., Wrapp, D., McLellan, J.S., Crispin, M., 2020. Site-specific glycan  
580 analysis of the SARS-CoV-2 spike. Science, eabb9983.

581 Waterhouse, A., Bertoni, M., Bienert, S., Studer, G., Tauriello, G., Gumienny, R., Heer, F.T., de  
582 Beer, T.A.P., Rempfer, C., Bordoli, L., 2018. SWISS-MODEL: homology modelling of  
583 protein structures and complexes. Nucleic Acids Research, 46, W296-W303.

584 Wu, C., Liu, Y., Yang, Y., Zhang, P., Zhong, W., Wang, Y., Wang, Q., Xu, Y., Li, M., Li, X.,  
585 2020. Analysis of therapeutic targets for SARS-CoV-2 and discovery of potential drugs  
586 by computational methods. Acta Pharmaceutica Sinica B, 10(5), 766-788. Yin, C., 2020.  
587 Genotyping coronavirus SARS-CoV-2: methods and implications. Genomics,  
588 <https://doi.org/10.1016/j.ygeno.2020.04.016>.

589 Yuan, M., Wu, N.C., Zhu, X., Lee, C.-C.D., So, R.T., Lv, H., Mok, C.K., Wilson, I.A., 2020. A  
590 highly conserved cryptic epitope in the receptor binding domains of SARS-CoV-2 and  
591 SARS-CoV. Science, 368, 630-633.

592 Zhou, H., Chen, Y., Zhang, S., Niu, P., Qin, K., Jia, W., Huang, B., Zhang, S., Lan, J., Zhang, L.,  
593 Tan, W. 2019. Structural definition of a neutralization epitope on the N-terminal domain  
594 of MERS-CoV spike glycoprotein. Nature Communications, 10, 1-13.

595

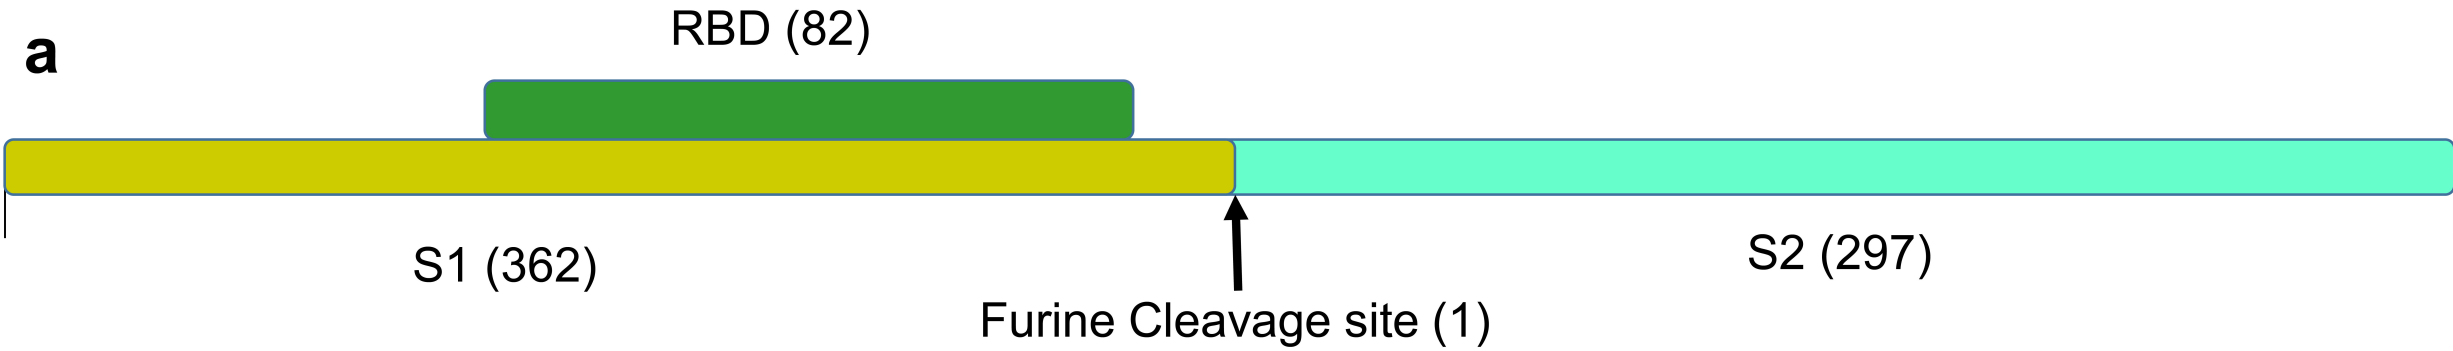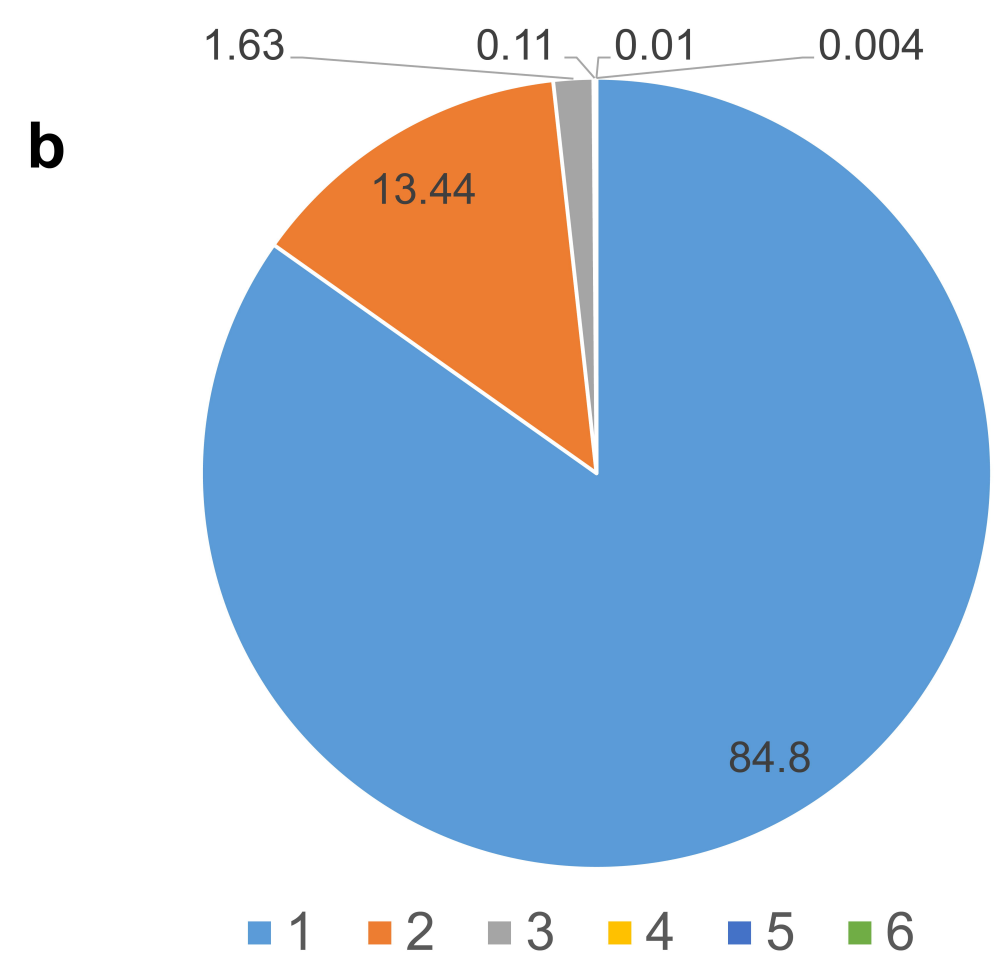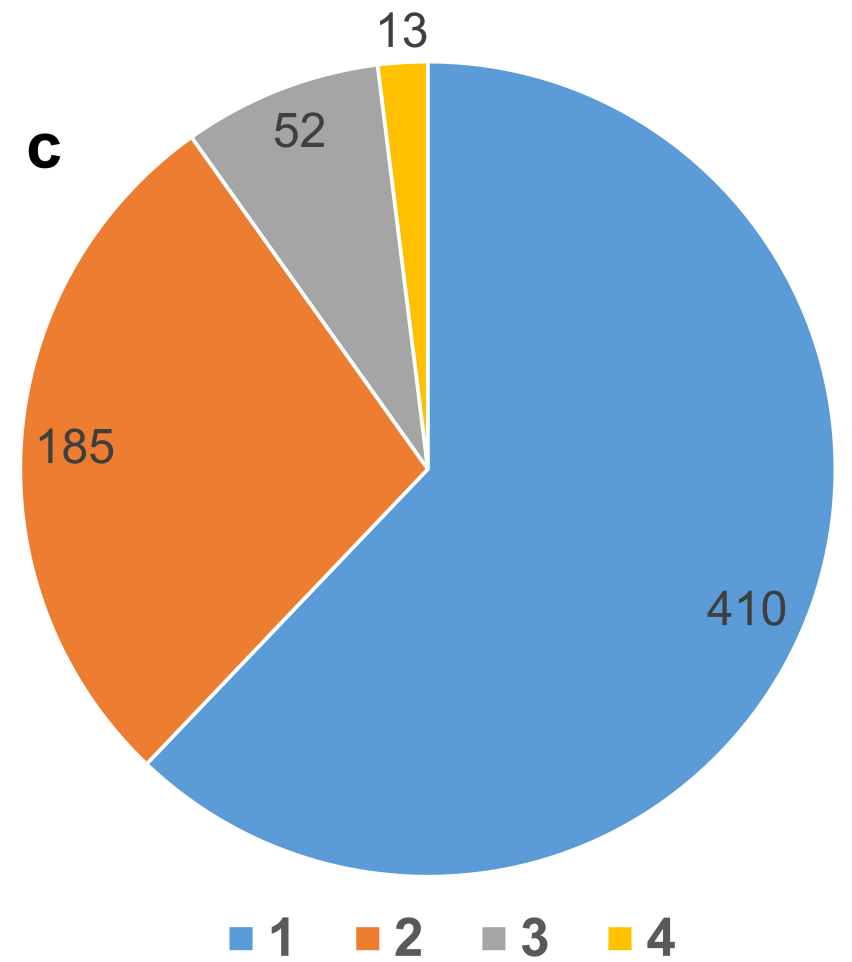

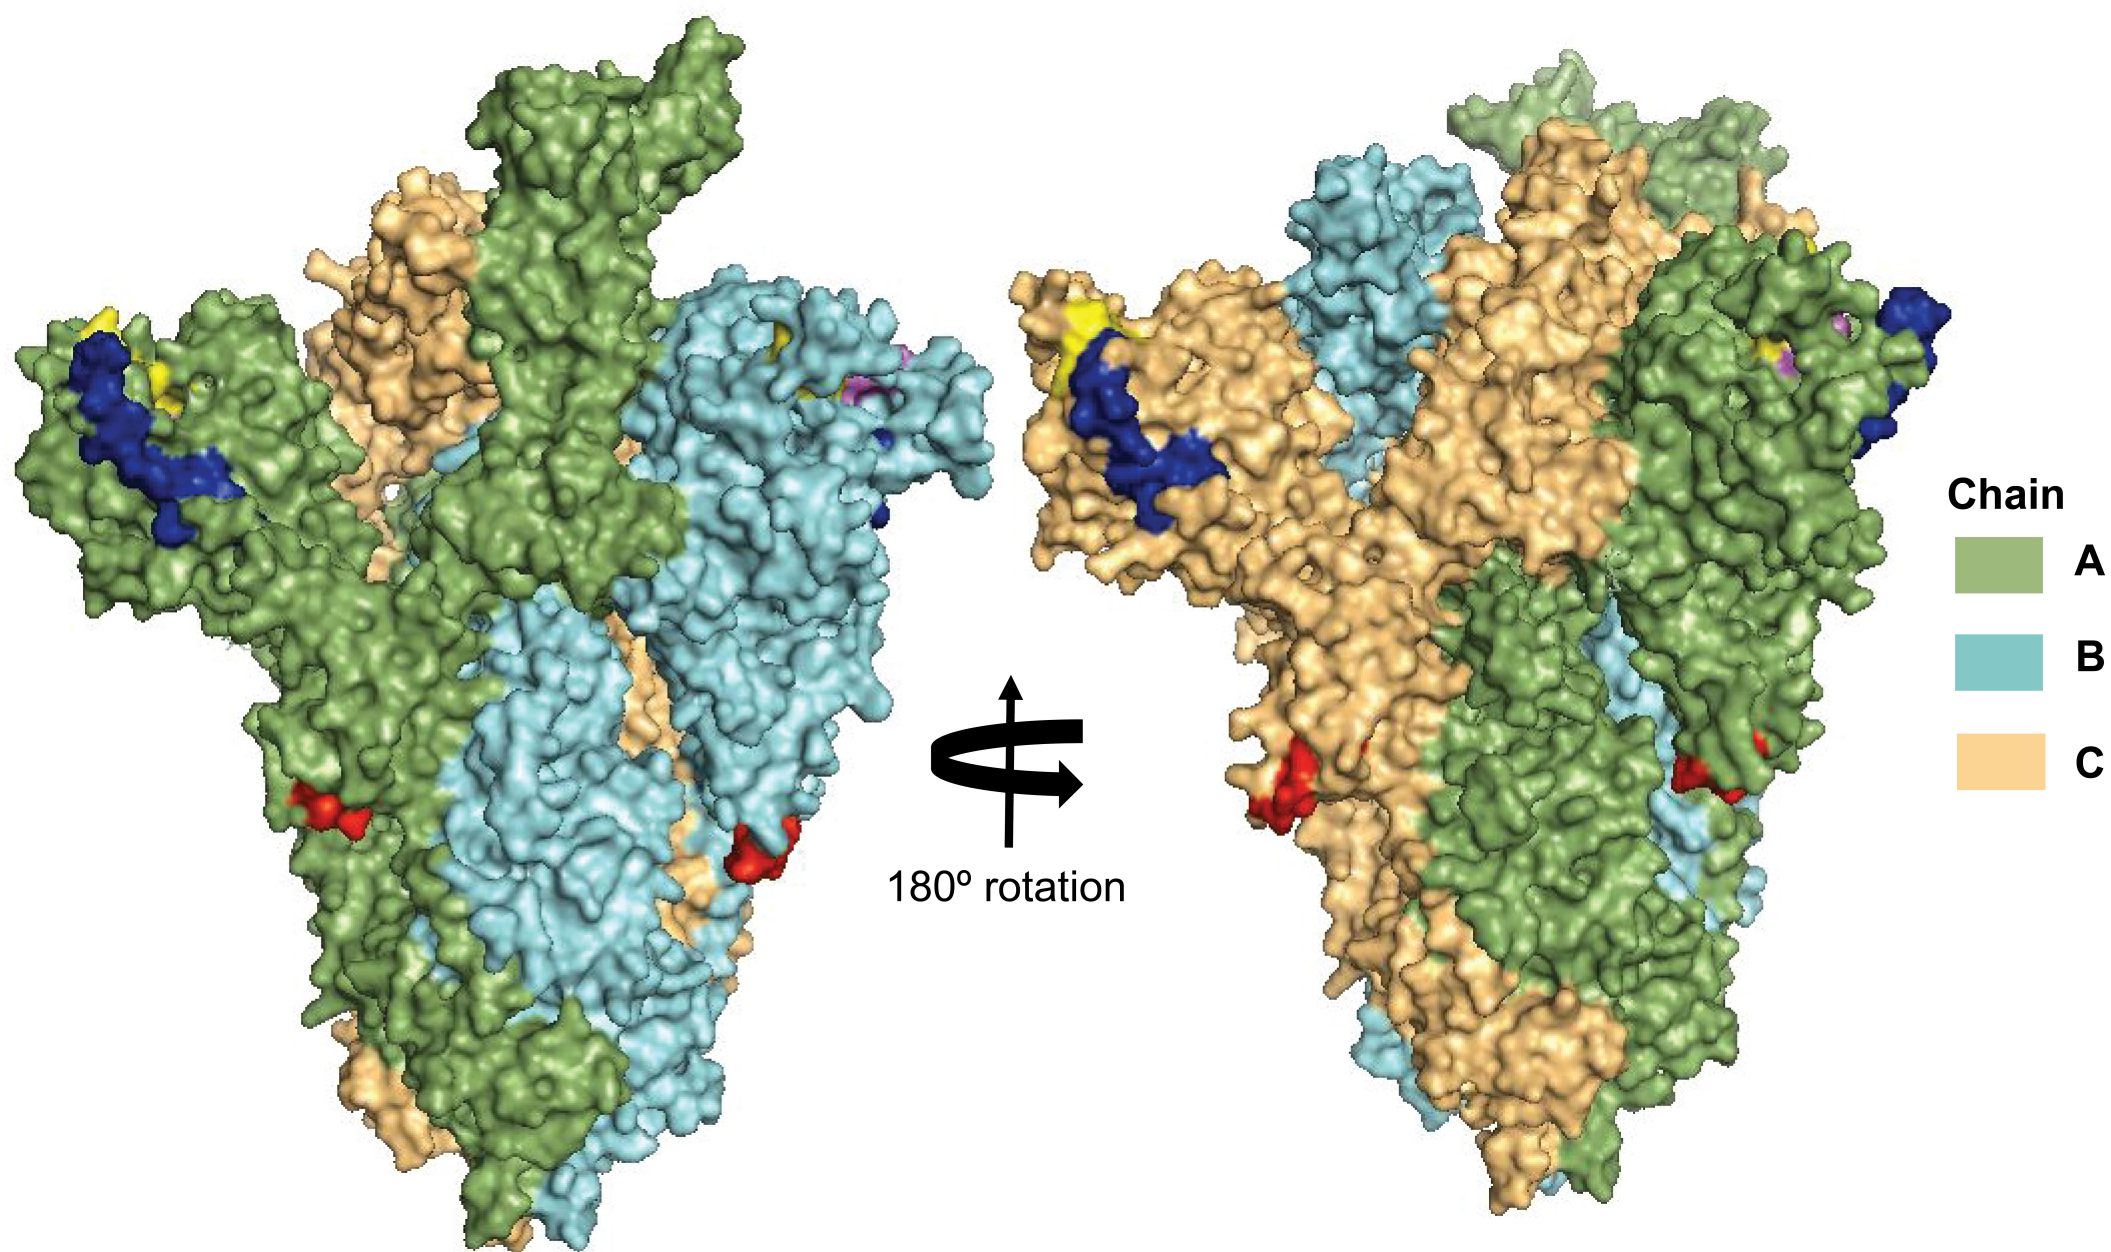

Chain

- A
- B
- C

61-76 138-144 241-244 675-679



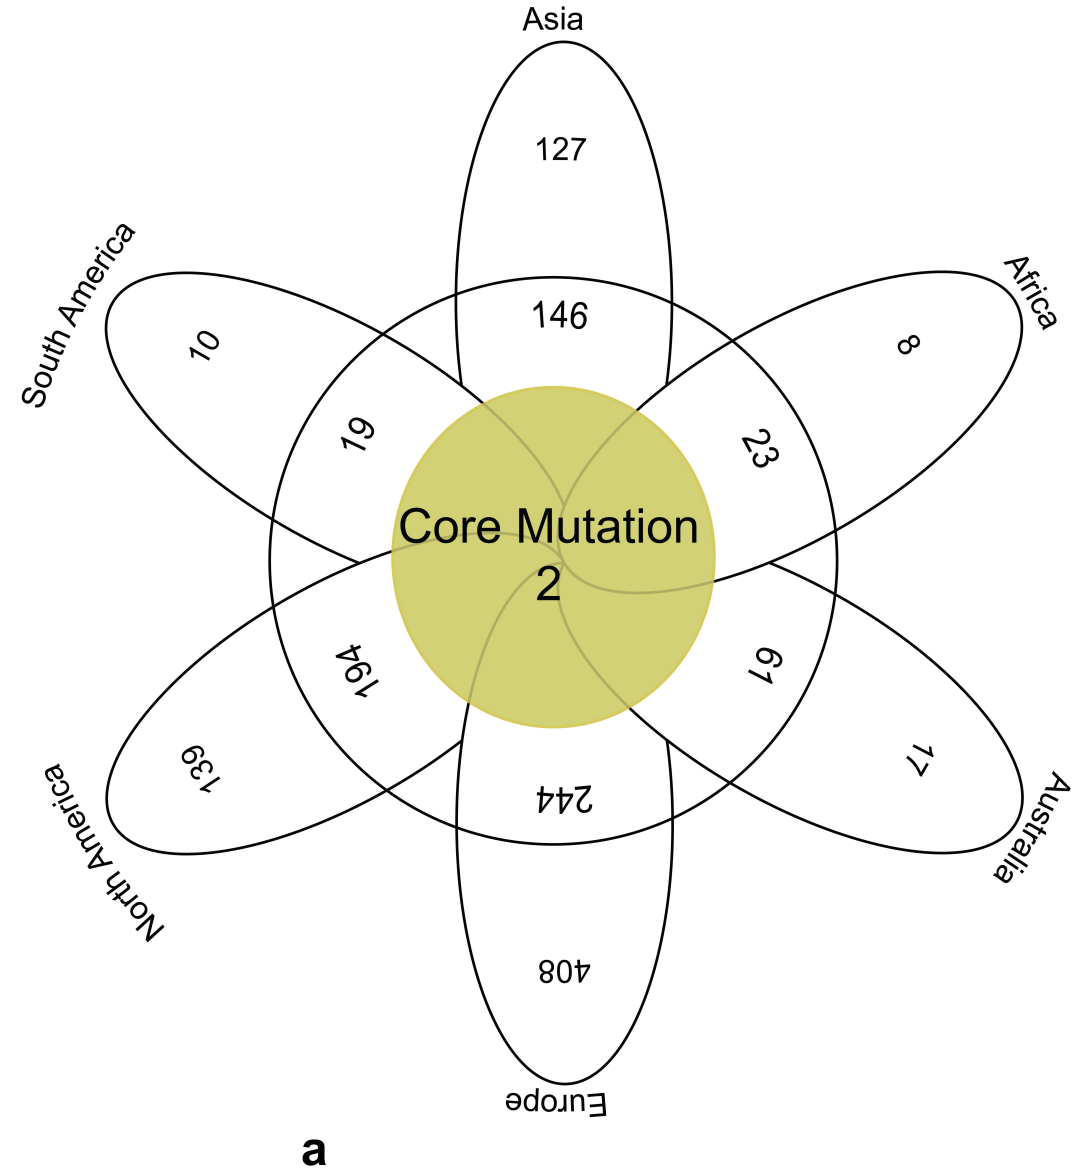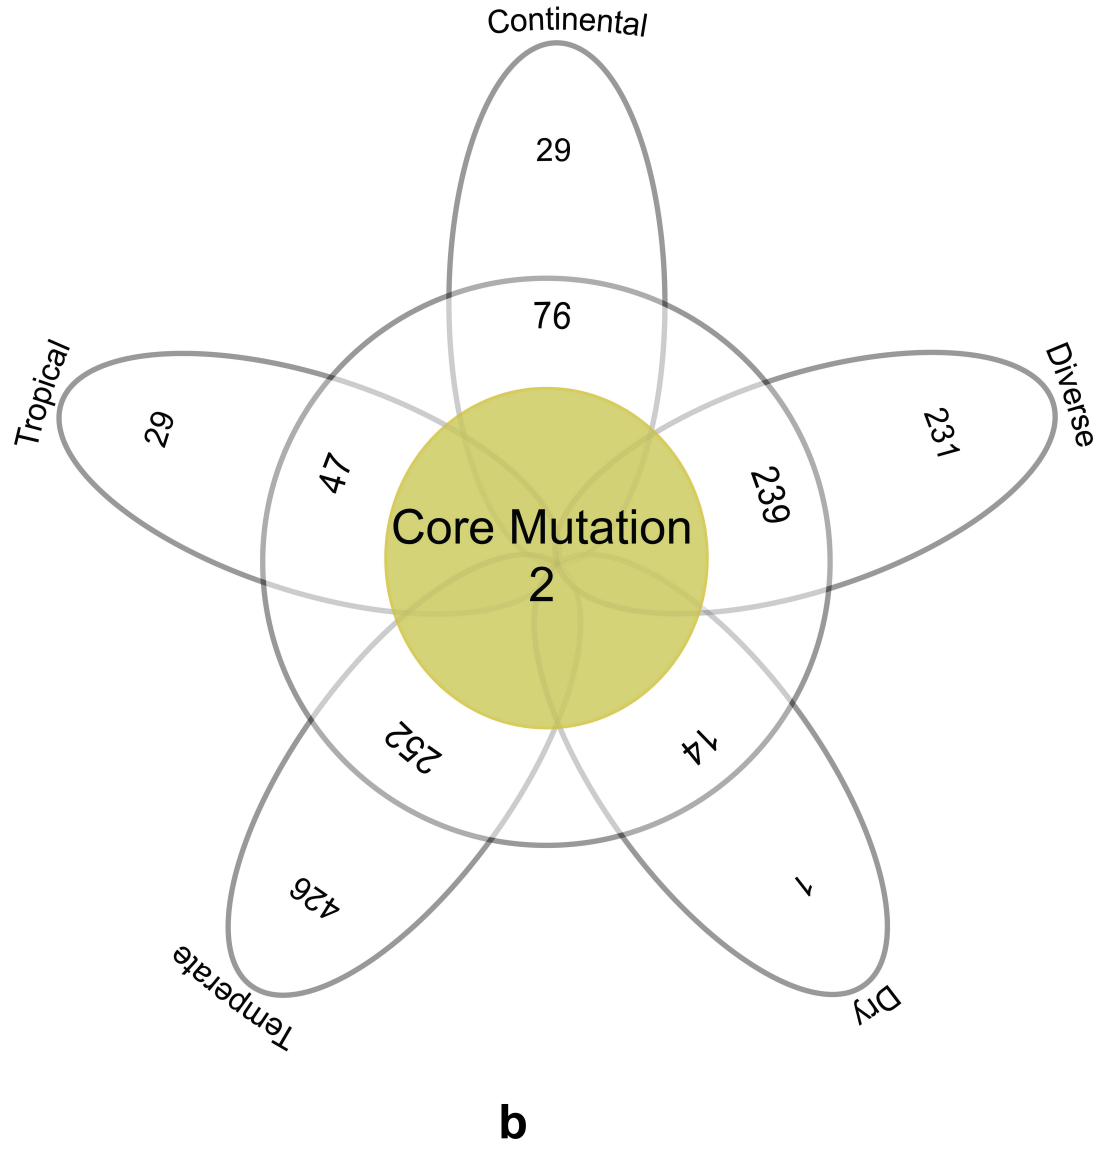

Table 1: Amino Acid variation of S glycoprotein according to their position. Here, the position where variation more than 2 are represented.

| Positon In S | Number of Variation | Name of Amino Acid                | Positon In S | Number of Variation | Name of Amino Acid     |
|--------------|---------------------|-----------------------------------|--------------|---------------------|------------------------|
| 32           | 4                   | F32L, F32Y, F32I, F32V            | 273          | 3                   | R273M, R273K, R273S    |
| 142          | 4                   | G142D, G142A, G142V, G142S        | 354          | 3                   | N354D, N354K, N354S    |
| 146          | 4                   | H146Q, H146N, H146Y, H146R        | 414          | 3                   | Q414R, Q414K, Q414P    |
| 215          | 4                   | D215Y, D215H, D215G, D215N        | 468          | 3                   | I468F, I468T, I468V    |
| 261          | 4                   | G261V, G261S, G261D, G261R        | 483          | 3                   | V483F, V483I, V483A    |
| 477          | 4                   | S477I, S477N, S477R, S477G        | 558          | 3                   | K558N, K558Q, K558R    |
| 529          | 4                   | K529M, K529N, K529R, K529E        | 615          | 3                   | V615I, V615F, V615L    |
| 570          | 4                   | A570S, A570V, A570D, A570T        | 654          | 3                   | E654D, E654Q, E654K    |
| 622          | 4                   | V622F, V622L, V622I, V622A, A623V | 675          | 3                   | Q675H, Q675R, Q675K    |
| 778          | 4                   | T778S, T778A, T778N, T778I        | 677          | 3                   | Q677H, Q677R, Q677Y    |
| 791          | 4                   | T791I, T791A, T791K, T791P        | 681          | 3                   | P681H, P681L, P681S    |
| 1146         | 4                   | D1146Y, D1146H, D1146E, D1146N    | 684          | 3                   | A684V, A684T, A684S    |
| 1162         | 4                   | P1162L, P1162T, P1162A, P1162S    | 747          | 3                   | T747A, T747I, T747N    |
| 19           | 3                   | T19P, T19I, T19S                  | 750          | 3                   | S750N, S750R, S750I    |
| 21           | 3                   | R21I, R21T, R21K                  | 752          | 3                   | L752I, L752R, L752F    |
| 22           | 3                   | T22N, T22I, T22A                  | 765          | 3                   | R765L, R765H, R765C    |
| 26           | 3                   | P26L, P26S, P26R                  | 772          | 3                   | V772L, V772I, V772A    |
| 27           | 3                   | A27V, A27T, A27S                  | 780          | 3                   | E780D, E780Q, E780V    |
| 72           | 3                   | G72E, G72W, G72R                  | 812          | 3                   | P812S, P812T, P812L    |
| 75           | 3                   | G75D, G75V, G75R                  | 831          | 3                   | A831S, A831V, A831T    |
| 80           | 3                   | D80N, D80Y, D80A                  | 836          | 3                   | Q836H, Q836P, Q836L    |
| 97           | 3                   | K97E, K97N, K97R                  | 838          | 3                   | G838S, G838V, G838D    |
| 102          | 3                   | R102S, R102I, R102G               | 839          | 3                   | D839Y, D839E, D839N    |
| 148          | 3                   | N148Y, N148K, N148S               | 845          | 3                   | A845S, A845V, A845D    |
| 153          | 3                   | M153T, M153I, M153V               | 847          | 3                   | R847T, R847I, R847K    |
| 183          | 3                   | Q183H, Q183R, Q183L               | 870          | 3                   | I870S, I870T, I870V    |
| 218          | 3                   | Q218R, Q218E, Q218L               | 879          | 3                   | A879S, A879V, A879T    |
| 222          | 3                   | A222V, A222S, A222P               | 930          | 3                   | A930S, A930V, A930T    |
| 239          | 3                   | Q239K, Q239R, Q239H               | 1085         | 3                   | G1085R, G1085E, G1085L |
| 246          | 3                   | R246I, R246K, R246S               | 1129         | 3                   | V1129L, V1129A, V1129I |
| 247          | 3                   | S247R, S247I, S247N               | 1153         | 3                   | D1153A, D1153H, D1153Y |
| 251          | 3                   | P251S, P251H, P251L               | 1170         | 3                   | S1170T, S1170Y, S1170P |
| 263          | 3                   | A263T, A263S, A263V               |              |                     |                        |



**Table: 2** Deletion-sites observed across the S glycoprotein. Countries represent the origin of strains where the deletions found. We considered the deletions that occurred in at least two strains in a certain position.

| Nucleotide Position | Amino acid position | Deleted amino acid | Countries                                                                                                   | Number of Strains |
|---------------------|---------------------|--------------------|-------------------------------------------------------------------------------------------------------------|-------------------|
| 179-217             | 61-73               | NVTWFHAIHVSGT      | England                                                                                                     | 1                 |
| 200-226             | 68-76               | IHVSGTNGT          | Taiwan, Malaysia                                                                                            | 2                 |
| 201-224             | 68-75               | IHVSGTNG           | Thailand                                                                                                    | 1                 |
| 203-208             | 69-70               | HV                 | Sweden, England, Australia                                                                                  | 3                 |
| 413-421             | 138-140             | DPF                | Sweden                                                                                                      | 1                 |
| 418-420             | 140                 | F                  | England, Sichuan                                                                                            | 3                 |
| 420-431             | 141-144             | LGVY               | England, Iceland, USA, Scotland, Kenya                                                                      | 16                |
| 420-422             | 141                 | L                  | England                                                                                                     | 1                 |
| 422-430             | 141-143             | LGV                | Portugal, England, Iceland, Scotland                                                                        | 4                 |
| 423-431             | 142-144             | GVY                | England, Netherlands                                                                                        | 3                 |
| 428-430             | 143                 | V                  | USA, Belgium                                                                                                | 4                 |
| 428-433             | 143-144             | VY                 | England                                                                                                     | 2                 |
| 429-431             | 145                 | Y                  | England, Canada, Slovenia, Jordan, Netherlands, Saudi_Arabia, Scotland, USA, Spain, Wales, India, Australia | 48                |
| 724-732             | 241-243             | LLA                | China, England, Belgium, Scotland, Netherlands                                                              | 6                 |
| 724-726             | 241                 | L                  | USA                                                                                                         | 2                 |
| 727-732             | 243-244             | AL                 | England, Wales, Spain, Sichuan                                                                              | 6                 |
| 2021-2035           | 675-679             | QTQTN              | Taiwan, Malaysia                                                                                            | 2                 |
